# Supplementary material for: Randomized, Open-Label, Phase 1/2a Study to Determine the Maximum Tolerated Dose of Intraventricular Sustained Release Nimodipine for Subarachnoid Hemorrhage (NEWTON [Nimodipine Microparticles to Enhance Recovery While Reducing Toxicity After Subarachnoid Hemorrhage])
Source: PubMed Central journal article supplement — Stroke. 2016 Dec 23;48(1):145–51. doi: 10.1161/STROKEAHA.116.014250 (PMC5176000; doi:10.1161/strokeaha.116.014250), 2016-12-23

**ONLINE SUPPLEMENT**

List of sites and investigators.

| <b>Site</b>                                                              | <b>Investigator</b>                                                                                                                               |
|--------------------------------------------------------------------------|---------------------------------------------------------------------------------------------------------------------------------------------------|
| University of Cincinnati, Cincinnati, Ohio,<br>USA                       | Mario Zuccarello, M.D., Todd Abruzzo,<br>M.D., Lynn Money                                                                                         |
| Columbia University, New York, New York,<br>USA                          | Jan Claassen, M.D., Cristina Falo, Ph.D.                                                                                                          |
| University of Maryland, Baltimore,<br>Maryland, USA                      | Francois Aldrich, M.D., Charlene Aldrich                                                                                                          |
| Cleveland Clinic, Cleveland, Ohio, USA                                   | Jennifer Frontera, M.D., Peter Rasmussen,<br>M.D., Edward Manno, M.D., Javier<br>Provencio, M.D., Joao Gomes, M.D.,<br>Moneen McBride, Erin Bynum |
| University of New Mexico, Albuquerque,<br>New Mexico, USA                | Andrew Carlson, M.D., Howard Yonas,<br>M.D., Brittany Burlbaw, Theresa Wussow                                                                     |
| Duke University, Durham, North Carolina,<br>USA                          | Carmen Graffagnino, M.D., Kristina Riemen                                                                                                         |
| Medical University of South Carolina,<br>Charleston, South Carolina, USA | Raymond Turner, M.D., Adrian Parker,<br>Emily Young                                                                                               |
| University of California, Los Angeles,<br>California, USA                | Paul Vespa, M.D., Courtney Real                                                                                                                   |
| Overlook Medical Center, Summit, New<br>Jersey, USA                      | Robert Felberg, M.D., Igor Ugorec, M.D.,<br>Caroline Panter, Olivia Joy Eboras                                                                    |
| St. Joseph's Hospital, Phoenix, Arizona, USA                             | Joseph Zabramski, M.D., Jean Lopez, Mary                                                                                                          |

|                                                                                                 |                                                                              |
|-------------------------------------------------------------------------------------------------|------------------------------------------------------------------------------|
|                                                                                                 | Harrigan                                                                     |
| Hackensack University Medical Center,<br>Hackensack, New Jersey, USA                            | Daniel Walzman, M.D., Jana Tancredi                                          |
| St. Michael's Hospital, Toronto, Ontario,<br>Canada                                             | Julian Spears, M.D., Marlene Santos, Ph.D.                                   |
| University of Calgary, Calgary, Alberta,<br>Canada                                              | John Wong, M.D., Teri Steward, Karla<br>Ryckborst                            |
| University of Alberta, Edmonton, Alberta,<br>Canada                                             | Tim Darsaut, M.D., Brenda Poworoznik                                         |
| Royal University Hospital, Saskatoon,<br>Saskatchewan, Canada                                   | Michael Kelly, M.D., Ruth Whelan                                             |
| Oregon Health Sciences Center, Portland,<br>Oregon, USA                                         | Wayne Clark, M.D., Hormozd Bozorgchami,<br>M.D., Darren Larsen, Monica Dolan |
| University Health Network, Toronto, Ontario,<br>Canada                                          | Michael Tymianski, M.D., Ph.D., Alex<br>Kostynsky                            |
| Mount Sinai Medical Center, New York,<br>New York, USA                                          | Erol Gordon, M.D., Stephen Griffiths                                         |
| Rush University Medical Center, Chicago,<br>Illinois, USA                                       | George Lopez, M.D., Josephine Volgi                                          |
| North Shore Long Island Jewish Health<br>System Lenox Hill Hospital, New York, New<br>York, USA | John Boockvar, M.D., Michelle DeWitt                                         |

Supplemental Figure I: Diagram of the 2 parts, or dose-escalation and treatment parts of the study (top) and the 3 periods, or screening, treatment and follow-up, through which each patient was followed

Dose level/cohort:

**PART 1**  
Dose-escalation part  
Doses between 100 and 1200 mg subject to modification based on dose limiting toxicities and data monitoring committee recommendations

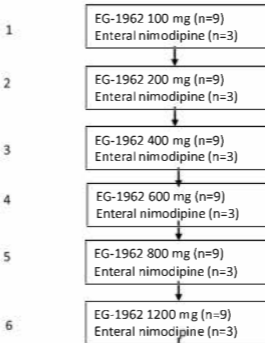

Maximum tolerated dose of EG-1962 established

Interim analysis of Part 1 for sample size estimation for Part 2

**PART 2**  
Treatment part

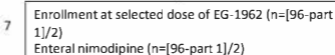

Supplement: str-48-145-s001.pdf [file str-48-145-s001.pdf]
